# Supplementary material
Source: publisher figshare collection journal article supplement (https://karger.figshare.com/ndownloader/files/25291946)
Supplement: Supplementary file 1 [file 25291946]

**ACCESSORY TABLE 1.** Predictors of survival in the whole study population according to the Cox regression analysis (not including treatment received).

| *Univariate analysis* | | | **VARIABLE** | *Multivariable analysis* | | |
| --- | --- | --- | --- | --- | --- | --- |
| ***HR*** | ***95% CI*** | ***p*** |  | ***HR*** | ***95% CI*** | ***p*** |
| 1.004 | 0.986-1.023 | 0.654 | **Age (year)** |  |  |  |
| 0.738 | 0.511-1.065 | 0.105 | **Female sex** |  |  |  |
|  |  |  | **Aetiology** |  |  |  |
| - | *Reference* | - | - Healthy liver |  |  |  |
| 0.625 | 0.306-1.274 | 0.196 | - HBV infection |  |  |  |
| 1.088 | 0.698-1.697 | 0.710 | - HCV infection |  |  |  |
| 0.783 | 0.495-1.241 | 0.298 | - Nonviral liver disease |  |  |  |
| 0.955 | 0.667-1.367 | 0.802 | **Cirrhosis** |  |  |  |
| 2.036 | 1.398-2.966 | <0.001 | **ECOG PS>0** | 1.701 | 1.125-2.572 | 0.012 |
| 1.009 | 1.005-1.014 | <0.001 | **Main tumor dimension (mm)** | 1.005 | 1.000-1.010 | 0.045 |
| 2.304 | 1.590-3.339 | <0.001 | **Multinodular disease** | 2.027 | 1.369-3.001 | <0.001 |
| 1.228 | 0.743-2.028 | 0.423 | **N1** |  |  |  |
| 3.839 | 2.195-6.714 | <0.001 | **M1** | 2.535 | 1.376-4.672 | 0.003 |
|  |  |  | **Tumor grading** |  |  |  |
| - | *Reference* | - | -G1 |  | *Reference* |  |
| 1.446 | 0.965-2.166 | 0.074 | -G2 | 1.351 | 0.889-2.053 | 0.159 |
| 2.141 | 1.299-3.527 | 0.003 | -G3 | 1.651 | 0.982-2.778 | 0.059 |
